# Supplementary material
Source: Research Square preprint supplement (doi:10.21203/rs.3.rs-9422106/v1)
Supplement: Supplementary file 1 [file cd4e0438851f56ee515c31c8.docx]

**Supplementary File 1**

**Interviewer-Administered Study Questionnaire**

*Developed specifically for this study | Not previously published*

Study: Community Empowerment for COVID-19 Prevention and NCD Risk Reduction Using a Health Promotion Approach — Alawwa, Sri Lanka (December 2020–April 2021)

**S1. Identification and Administrative Details**

Date of interview _______________________________________________

GN Division (Galoliyawa / Walikare / Nallura / Boyawalana / Henduwawa / Pangolla / Children's group) _______________________________________________

Village / Area _______________________________________________

Participant ID (assigned code — no names recorded) _______________________________________________

Interviewer name _______________________________________________

**S2. Participant Characteristics**

*No names or uniquely identifying information recorded. Age captured as range only, per ethics approval.*

1. Age group:

☐ 10–19 years

☐ 20–29 years

☐ 30–39 years

☐ 40–49 years

☐ 50–59 years

☐ 60–69 years

☐ 70 years or above

2. Sex:

☐ Female

☐ Male

☐ Prefer not to say

3. Role in community:

☐ Community leader

☐ Religious leader

☐ Youth volunteer (aged 10–19 years)

☐ Active community member

☐ Mother / primary caregiver

☐ Other: ___________________________

4. Household type:

☐ Nuclear

☐ Extended

☐ Single-member

5. Primary livelihood:

☐ Agriculture / farming

☐ Daily wage labour

☐ Small business

☐ Government or private employment

☐ Housework (unpaid)

☐ Other: ___________________________

6. Does any household member have a diagnosed NCD (diabetes, hypertension, heart disease, etc.)?

☐ Yes — condition: ___________________________

☐ No

☐ Unknown

**S3. COVID-19 Knowledge**

*Assessed at baseline (beginning of initial session) and after session. Corresponds to NCD risk knowledge scale (0–10) in manuscript.*

***S3.1 Knowledge of Transmission and Prevention***

7. How does COVID-19 mainly spread? (tick all that apply)

☐ Close contact with infected person

☐ Respiratory droplets from coughing, sneezing, or talking

☐ Touching contaminated surfaces then face

☐ Airborne in poorly ventilated spaces

☐ Contaminated food or water

☐ Don't know

8. Which of the following prevent COVID-19? (tick all that apply)

☐ Regular handwashing with soap

☐ Wearing mask correctly in public

☐ Maintaining physical distance

☐ Removing footwear before entering home

☐ Changing clothes after returning home

☐ Cough etiquette

☐ Don't know

9. Who is at highest risk of severe COVID-19? (tick all that apply)

☐ Elderly people

☐ People with NCDs

☐ People with disabilities

☐ Daily wage workers

☐ People returning from quarantine centres

☐ Don't know

***S3.2 NCD Risk Knowledge — Self-Rating Scale (0–10)***

*Enumerator: ask respondent to rate own knowledge. Circle the number. This is the primary pre-post knowledge measure in the study.*

10. At the BEGINNING of the programme, how would you rate your understanding of NCD risk factors?

**0 1 2 3 4 5 6 7 8 9 10**

*(0 = no knowledge; 10 = very thorough knowledge)*

11. NOW (after the programme), how would you rate your understanding of NCD risk factors?

**0 1 2 3 4 5 6 7 8 9 10**

12. What are the main risk factors for NCDs? (tick all that apply)

☐ Excess salt consumption

☐ Excess sugar consumption

☐ Excess oil/fat

☐ Physical inactivity

☐ Overweight / abdominal obesity

☐ Tobacco use

☐ Alcohol use

☐ Don't know

**S4. COVID-19 Preventive Behaviours**

*These correspond directly to the 19 process indicators assessed at programme end (Table 5 of study report).*

***S4.1 Household Hygiene Practices***

13. Does your household now have a dedicated handwashing place with soap and water?

☐ Yes — established because of the programme

☐ Yes — existed before the programme

☐ No

14. Does your household remove footwear before entering the home?

☐ Yes — started because of programme

☐ Yes — existing practice

☐ No

☐ Sometimes

15. Does your household change clothing after returning from outside?

☐ Yes — started because of programme

☐ Yes — existing practice

☐ No

☐ Sometimes

***S4.2 Mask Use and Physical Distancing***

16. During the COVID-19 period, did you consistently wear a mask correctly in public places?

☐ Yes, always

☐ Yes, most of the time

☐ Sometimes

☐ No

17. Did you maintain physical distance from others in public?

☐ Yes, consistently

☐ Sometimes

☐ No

***S4.3 Corona Calendar***

18. Did your household or community group use the Corona Calendar?

☐ Yes — household level

☐ Yes — community level

☐ Yes — both

☐ No

19. If yes, did the Corona Calendar help track COVID-19 prevention practices?

☐ Yes — very helpful

☐ Yes — somewhat helpful

☐ Not helpful

☐ N/A

20. At the time of data collection, what was your household's Corona Calendar colour classification?

☐ Red — high COVID-19 transmission risk

☐ Orange — medium risk

☐ Green — low risk

☐ Not classified

☐ N/A

Describe how the Corona Calendar was used in your household or community _______________________________________________

**S5. NCD Risk and Dietary Behaviour Change**

***S5.1 Dietary Behaviour Changes — Process Indicator Table***

*Corresponds directly to process indicators in Table 05, WHO Alawwa Final Report. These are the primary behavioural change indicators.*

| **Dietary / NCD behaviour** | **Yes — because of programme** | **Yes — pre-existing** | **No change** | **N/A** |
| --- | --- | --- | --- | --- |
| Reduced oil consumption | ☐ | ☐ | ☐ | ☐ |
| Reduced sugar consumption | ☐ | ☐ | ☐ | ☐ |
| Reduced salt consumption | ☐ | ☐ | ☐ | ☐ |
| Reduced flour / refined carbohydrates | ☐ | ☐ | ☐ | ☐ |
| Reduced junk food / ultra-processed food | ☐ | ☐ | ☐ | ☐ |
| Started checking E-numbers on packaged food | ☐ | ☐ | ☐ | ☐ |
| Started regular physical exercise | ☐ | ☐ | ☐ | ☐ |
| Reduced rice portion sizes | ☐ | ☐ | ☐ | ☐ |
| Initiated home gardening for food security | ☐ | ☐ | ☐ | ☐ |

***S5.2 Kussi (Kitchen) Calendar***

21. Did your household use the Kussi (Kitchen) Calendar to monitor kitchen NCD risk?

☐ Yes

☐ No — go to S5.3

22. What was your kitchen's colour classification when you FIRST started using the Kussi Calendar?

☐ Red — all four components (oil, sugar, salt, rice) above recommended levels

☐ Orange — one to three components above recommended

☐ Green — all four within recommended levels

☐ Did not classify at baseline

23. What is your kitchen's colour classification NOW?

☐ Red

☐ Orange

☐ Green

☐ Not currently monitoring

24. Did the Kussi Calendar help you reduce any of the following? (tick all that apply)

☐ Oil

☐ Sugar

☐ Salt

☐ Rice / carbohydrates

☐ All of the above

☐ No change

***S5.3 Waist Circumference and Weight***

25. Did you measure your waist circumference as part of the programme?

☐ Yes

☐ No

26. Baseline waist circumference classification (per WHO thresholds: female >80 cm; male >90 cm = elevated):

☐ Red — elevated

☐ Green — normal range

☐ Not recorded / don't know

27. Did your waist circumference change during the programme?

☐ Reduced

☐ Stayed the same

☐ Increased

☐ Did not monitor

28. Did you monitor your body weight during the programme?

☐ Yes

☐ No

29. If yes, did your weight change?

☐ Reduced

☐ Stayed the same

☐ Increased

☐ Not recorded

*Enumerator: Record current waist circumference (cm): ______ Classification: ☐ Elevated ☐ Normal*

**S6. Community Group Participation and Collective Engagement**

30. Did you attend an initial community session facilitated by the programme?

☐ Yes

☐ No

31. How many follow-up contacts (home visits, phone calls, internet) did your community group receive?

☐ 0

☐ 1

☐ 2

☐ 3

☐ More than 3

32. Is your household still actively participating in a community group?

☐ Yes — still active

☐ No — stopped after programme ended

☐ Never joined a formal group

33. Did new families join your group because of your experience, without programme instruction?

☐ Yes — approximately: ______ families

☐ No

☐ Don't know

34. How many community tools were developed and actively used in your area?

Corona Calendars: ______ _______________________________________________

Kussi Calendars: ______ _______________________________________________

Happiness Calendars: ______ _______________________________________________

35. Was a community play area created to promote physical activity?

☐ Yes

☐ No

**S7. Happiness Calendar and Family Wellbeing**

36. Did your household use the Happiness Calendar to track daily mood and family wellbeing?

☐ Yes

☐ No — go to S8

37. How was the Happiness Calendar used in your household?

☐ Recorded mood daily (happy / angry / sad)

☐ Used it to open conversations about stress or wellbeing

☐ Used it to identify what causes unhappiness and act on it

☐ Other: ___________________________

38. Did the Happiness Calendar lead to any changes in family dynamics or household relationships?

☐ Yes — describe: ___________________________

☐ No noticeable change

☐ N/A

**S8. COVID-19 Stigma, Social Solidarity, and Community Cohesion**

*Record responses verbatim where space provided. Corresponds to qualitative themes in the manuscript.*

39. During COVID-19, how did your community treat people who were infected or under quarantine?

☐ Excluded or isolated them from community life

☐ Supported them while ensuring they followed preventive measures

☐ Mixed response — some excluded, others supported

☐ No specific community response

☐ Don't know

40. Did the programme change how your community responded to COVID-19-affected families?

☐ Yes — more supportive and less stigmatising after the programme

☐ Yes — more careful but not exclusionary

☐ No change

☐ Don't know

41. Did your community provide practical support to affected families (food sharing, quarantine assistance)?

☐ Yes — regularly

☐ Yes — sometimes

☐ No

☐ Don't know

42. Do you believe your village was more resilient to COVID-19 than nearby villages that did not participate?

☐ Yes

☐ No

☐ About the same

☐ Don't know

If yes, what made the difference _______________________________________________

**S9. Women's Participation and Youth Engagement**

43. Did women in your community increase their participation in public activities (sports, community work, meetings) during or after the programme?

☐ Yes — significantly

☐ Yes — somewhat

☐ No change

☐ Don't know

44. Did any women initiate the 'Health of Home' concept or take on a health leadership role within their household?

☐ Yes

☐ No

☐ Don't know

45. Were children and youth (aged 10–19 years) actively involved in COVID-19 prevention in your community?

☐ Yes — describe role: ___________________________

☐ No

☐ Somewhat

46. Did youth use the Corona Calendar to monitor COVID-19 practices among peers in play areas?

☐ Yes

☐ No

☐ Don't know

**S10. Household Economic and Wellbeing Co-Benefits**

47. Did household spending on oil, sugar, salt, and flour decrease during the programme?

☐ Yes — significantly

☐ Yes — somewhat

☐ No

☐ Increased

48. Did reducing dietary commodity consumption result in overall household savings?

☐ Yes — saved money

☐ Somewhat

☐ No

Approximate monthly saving (LKR, if known) _______________________________________________

49. Did spending on medical treatment or hospital visits decrease during or after the programme?

☐ Yes

☐ No

☐ Not sure

50. Did children's smartphone / social media usage decrease as they became more engaged in community activities?

☐ Yes

☐ No

☐ Not applicable — no children

51. Did overall household stress levels change during the programme?

☐ Decreased

☐ Stayed the same

☐ Increased

**S11. Overall Programme Assessment**

52. How would you rate the overall impact of this programme on your household's health?

☐ Very high — significant and lasting change in multiple areas

☐ High — noticeable change in at least one area

☐ Moderate — some change but limited

☐ Low — very little change

☐ No impact

53. Which programme component was most useful for your household? (tick one)

☐ Corona Calendar

☐ Kussi (Kitchen) Calendar

☐ Happiness Calendar

☐ Initial group sessions with HP facilitators

☐ Follow-up home visits / telephone contacts

☐ Learning from other community members (peer learning)

☐ Children's group activities

54. Is your community group still active?

☐ Yes — activities continuing: ___________________________

☐ No — ended when programme ended

☐ Partially active

55. Would you recommend this programme to other communities?

☐ Definitely yes

☐ Probably yes

☐ Not sure

☐ No

56. What improvements would you suggest?

Suggestion 1 _______________________________________________

Suggestion 2 _______________________________________________

**S12. Participant Narrative — Open-Ended**

*Allow respondent to speak freely. Record verbatim in respondent's language. Translate to English for analysis. Do NOT record names or unique identifiers. Report only age group and sex.*

Please describe in your own words the most significant change this programme brought about for you, your household, or your community:

_______________________________________________

_______________________________________________

_______________________________________________

_______________________________________________

*Age group: _______________ Sex: _______________ Recording complete: ☐ Yes*
